# Supplementary material
Source: Springer Nature journal article supplement (https://www.springermedizin.de/resource/supplementary/12943_2009_480_MOESM3_ESM.pdf/9554390)
Supplement: MOESM3 [file 9554390]

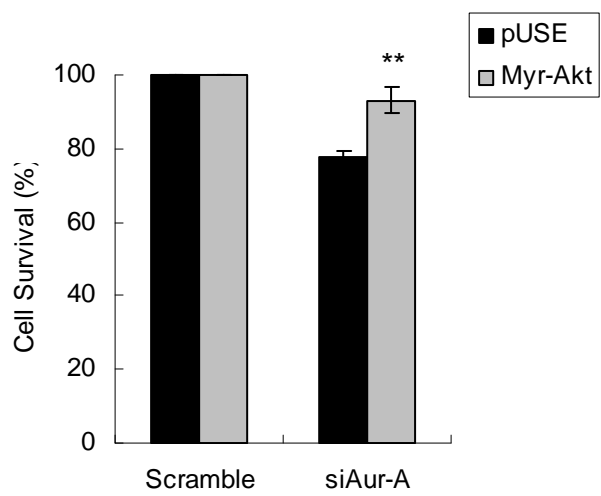

Additional file 3
